# Supplementary material for: Identification of fibroblast progenitors in the developing mouse thymus
Source: Oxford University Press journal article supplement (doi:10.1242/dev.200513), 2022-05-15
Supplement: dev200513supp.pdf [file dev200513supp.pdf]

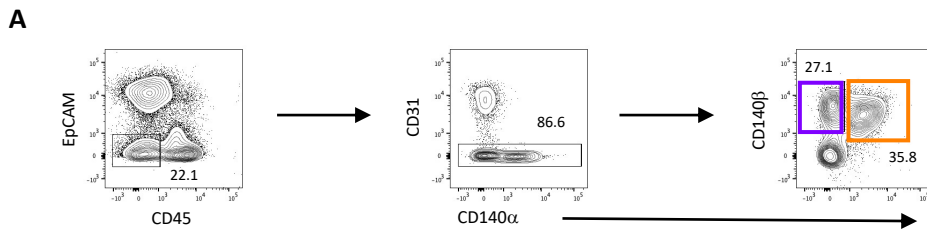

**Fig. S1. Gating strategy for flow cytometry analysis of thymic mesenchymal cells.** (A) Representative analysis of cells obtained from 1 week-old thymus depicting the gating strategy used to identify TMCs defined as clusters 2 and cluster 3. Numbers in plots indicate the frequency of cells found within each gate.

## Supplementary Figure 2

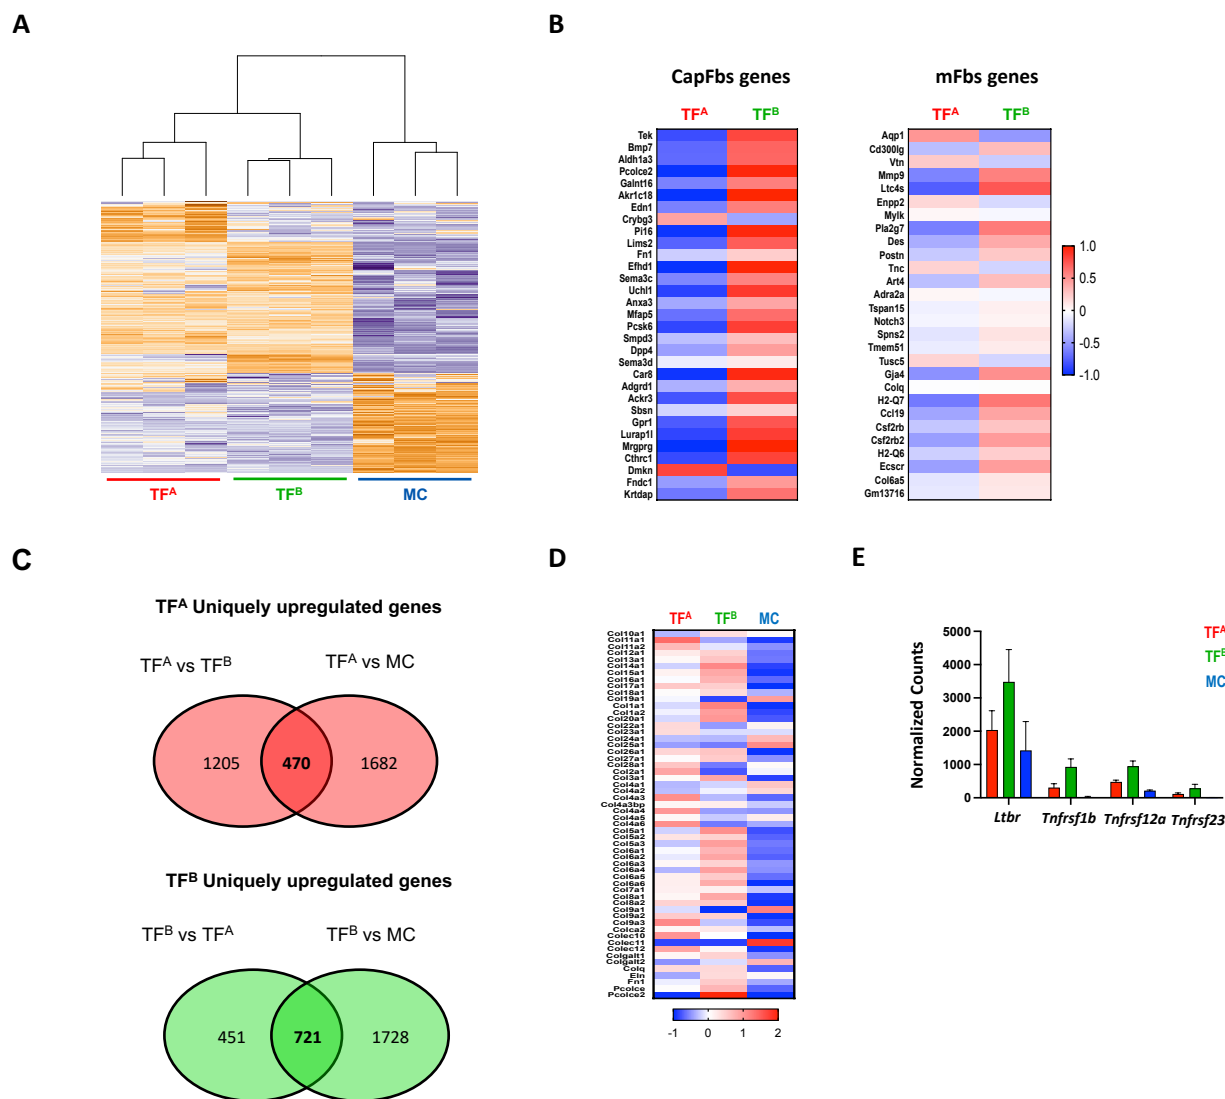

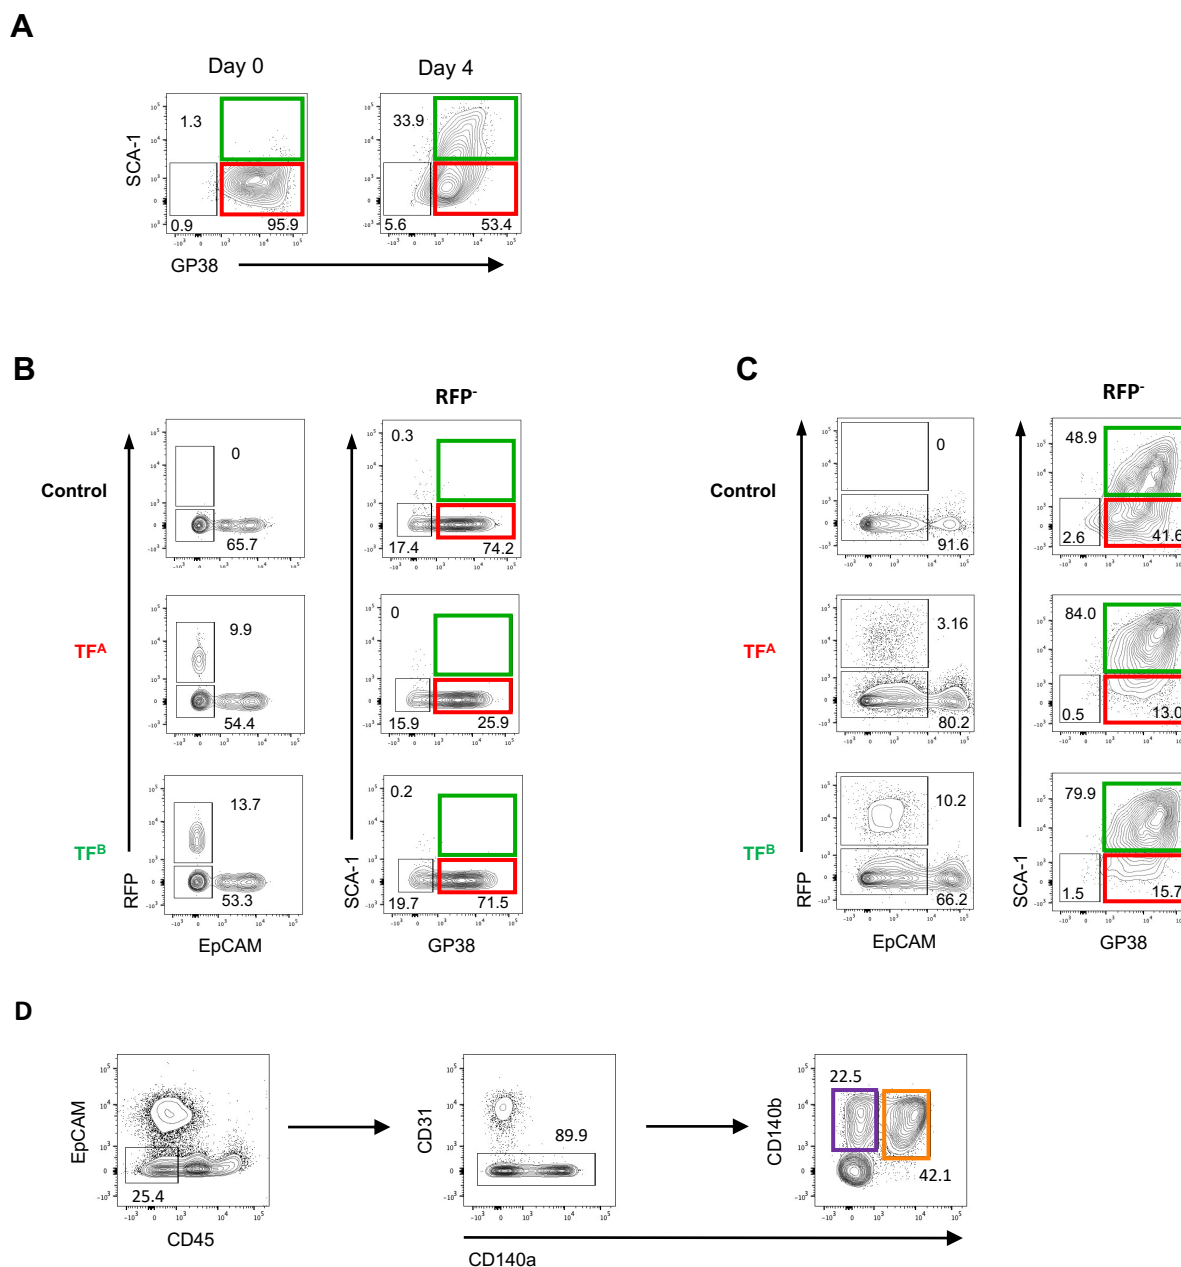

**Fig. S3. Precursor-Product relationship between TF subsets.** (A) Flow cytometry analysis of the expression pattern of GP38 and SCA-1 at day 0 and after 4 days in culture, from TMCs obtained from fetal thymic organ cultures (FTOC) established with thymic lobes collected from E14 C57BL/6 mice. (B) Flow cytometry analysis of day 0 (input) and day 7 (output) RTOC established by combining cells obtained from disaggregated E14 thymus cells from C57BL/6 mice alone (Control) or co-cultured with either TF<sup>A</sup> or TF<sup>B</sup> cells isolated from Post-natal day P1-P3 Actin-RFP C57BL/6 mice. (C) Representative analysis of cells obtained from 1 week-old thymus depicting the gating strategy used to identify TMCs defined as clusters 2 and cluster 3 in *RAG2*<sup>-/-</sup> *I12rg*<sup>-/-</sup>. Numbers in plots indicate the frequency of cells found within each gate.

**Table S1. Total normalized counts for all detected genes in the RNAseq analysis of populations TF<sup>A</sup>, TF<sup>B</sup> and MC.**

[Click here to download Table S1](#)

**Table S2. Total normalized counts and deviation to the mean expression value obtained for genes used as phenotypic markers of populations TF<sup>A</sup>, TF<sup>B</sup> and MC and for genes previously associated with pericyte and fibroblast cells.**

[Click here to download Table S2](#)

**Table S3. Total normalized counts and deviation to the mean expression value obtained for genes previously associated with capsular fibroblast cells in our TF<sup>A</sup> and TF<sup>B</sup> cell populations.**

[Click here to download Table S3](#)

**Table S4. Total normalized counts and deviation to the mean expression value obtained for genes previously associated with medullar fibroblast cells in our TF<sup>A</sup> and TF<sup>B</sup> cell populations.**

[Click here to download Table S4](#)

**Table S5. Total normalized counts of the uniquely upregulated genes of population TF<sup>A</sup> in relation to populations TF<sup>B</sup> and MC.**

[Click here to download Table S5](#)

**Table S6. Total normalized counts of the uniquely upregulated genes of population TF<sup>B</sup> in relation to populations TF<sup>A</sup> and MC.**

[Click here to download Table S6](#)

**Table S7. Total normalized counts of the gene ontology analysis of the uniquely upregulated genes of population TF<sup>A</sup>.**

[Click here to download Table S7](#)

**Table S8. Total normalized counts of the gene ontology analysis of the uniquely upregulated genes of population TF<sup>B</sup>.**

[Click here to download Table S8](#)

**Table S9. Total normalized counts and deviation to the mean expression value obtained for collagen and ECM associated genes in our TF<sup>A</sup> and TF<sup>B</sup> cell populations.**

[Click here to download Table S9](#)
